# Supplementary material for: Monosynaptic Tracing Success Depends Critically on Helper Virus Concentrations
Source: Front Synaptic Neurosci. 2020 Feb 14;12:6. doi: 10.3389/fnsyn.2020.00006 (PMC7033752; doi:10.3389/fnsyn.2020.00006)
Supplement: Supplementary file 2 [file Table_1.XLSX]

## Sheet: Table_S1
PILOT EXPERIMENTS WITH RV∆G-4FLPo
SINGLE TRICISTRONIC HELPER
virus condition	genotype	mouse #	series	count location	# contralateral cells	# contralateral cells (total per animal)
sTpEpB (undiluted)	PV-Cre	18022605LJ	A	Contralateral Cortex	201	585
sTpEpB (undiluted)	PV-Cre	18022605LJ	B	Contralateral Cortex	180
sTpEpB (undiluted)	PV-Cre	18022605LJ	C	Contralateral Cortex	204
sTpEpB (undiluted)	PV-Cre	19100803TL	A	Contralateral Cortex	0	0
sTpEpB (undiluted)	PV-Cre	19100803TL	B	Contralateral Cortex	0
sTpEpB (undiluted)	PV-Cre	19100803TL	C	Contralateral Cortex	0
sTpEpB (undiluted)	Cre-negative	18030102LJ	A	Injection Site	531	1585
sTpEpB (undiluted)	Cre-negative	18030102LJ	B	Injection Site	541
sTpEpB (undiluted)	Cre-negative	18030102LJ	C	Injection Site	513
sTpEpB (undiluted)	Cre-negative	18030103LJ	A	Injection Site	499	1340
sTpEpB (undiluted)	Cre-negative	18030103LJ	B	Injection Site	433
sTpEpB (undiluted)	Cre-negative	18030103LJ	C	Injection Site	408
TWO-HELPER COMBINATION
virus condition	genotype	mouse #	series	count location	# contralateral cells	# contralateral cells (total per animal)
sTpEptTA (undiluted)	PV-Cre	18022606NL	A	Contralateral Cortex	0	1
sTpEptTA (undiluted)	PV-Cre	18022606NL	B	Contralateral Cortex	0
sTpEptTA (undiluted)	PV-Cre	18022606NL	C	Contralateral Cortex	1
sTpEptTA (undiluted)	PV-Cre	18022606LJ	A	Contralateral Cortex	0	0
sTpEptTA (undiluted)	PV-Cre	18022606LJ	B	Contralateral Cortex	0
sTpEptTA (undiluted)	PV-Cre	18022606LJ	C	Contralateral Cortex	0
sTpEptTA (undiluted)	Cre-negative	18030501LJ	A	Injection Site	124	404
sTpEptTA (undiluted)	Cre-negative	18030501LJ	B	Injection Site	140
sTpEptTA (undiluted)	Cre-negative	18030501LJ	C	Injection Site	140
sTpEptTA (undiluted)	Cre-negative	18030502LJ	A	Injection Site	120	361
sTpEptTA (undiluted)	Cre-negative	18030502LJ	B	Injection Site	112
sTpEptTA (undiluted)	Cre-negative	18030502LJ	C	Injection Site	129
sTpEptTA (diluted)	PV-Cre	18050701LJ	A	Contralateral Cortex	245	721
sTpEptTA (diluted)	PV-Cre	18050701LJ	B	Contralateral Cortex	234
sTpEptTA (diluted)	PV-Cre	18050701LJ	C	Contralateral Cortex	242
sTpEptTA (diluted)	PV-Cre	18050702TL	A	Contralateral Cortex	475	1340
sTpEptTA (diluted)	PV-Cre	18050702TL	B	Contralateral Cortex	422
sTpEptTA (diluted)	PV-Cre	18050702TL	C	Contralateral Cortex	443
sTpEptTA (diluted)	Cre-negative	18050702LJ	A	Injection Site	363	1070
sTpEptTA (diluted)	Cre-negative	18050702LJ	B	Injection Site	374
sTpEptTA (diluted)	Cre-negative	18050702LJ	C	Injection Site	333
sTpEptTA (diluted)	Cre-negative	18050701TL	A	Injection Site	151	454
sTpEptTA (diluted)	Cre-negative	18050701TL	B	Injection Site	156
sTpEptTA (diluted)	Cre-negative	18050701TL	C	Injection Site	147
RABIES VIRUS ONLY
virus condition	genotype	mouse #	series	count location	# contralateral cells	# contralateral cells (total per animal)
No helper viruses	PV-Cre	18050302TL	A	Anywhere	1	7
No helper viruses	PV-Cre	18050302TL	B	Anywhere	6
No helper viruses	PV-Cre	18050302TL	C	Anywhere	0
No helper viruses	Cre-negative	18050305TL	A	Anywhere	3	6
No helper viruses	Cre-negative	18050305TL	B	Anywhere	2
No helper viruses	Cre-negative	18050305TL	C	Anywhere	1
